# Supplementary material
Source: PubMed Central journal article supplement (PMC6583388)
Supplement: jamasurg-154-516-s001.pdf [file jamasurg-154-516-s001.pdf]

## Supplementary Online Content

Antunez AG, Kanters AE, Regenbogen SE. Evaluation of access to hospitals most ready to achieve national accreditation for rectal cancer treatment. *JAMA Surg*. Published online February 20, 2019. doi:10.1001/jamasurg.2018.5521

**eFigure.** Adjusted Survival Curves by Hospital Group

**eTable.** Cox Proportional Hazards Model Results for Each Term in the Model

This supplementary material has been provided by the authors to give readers additional information about their work.

eFigure: Adjusted survival curves by hospital group

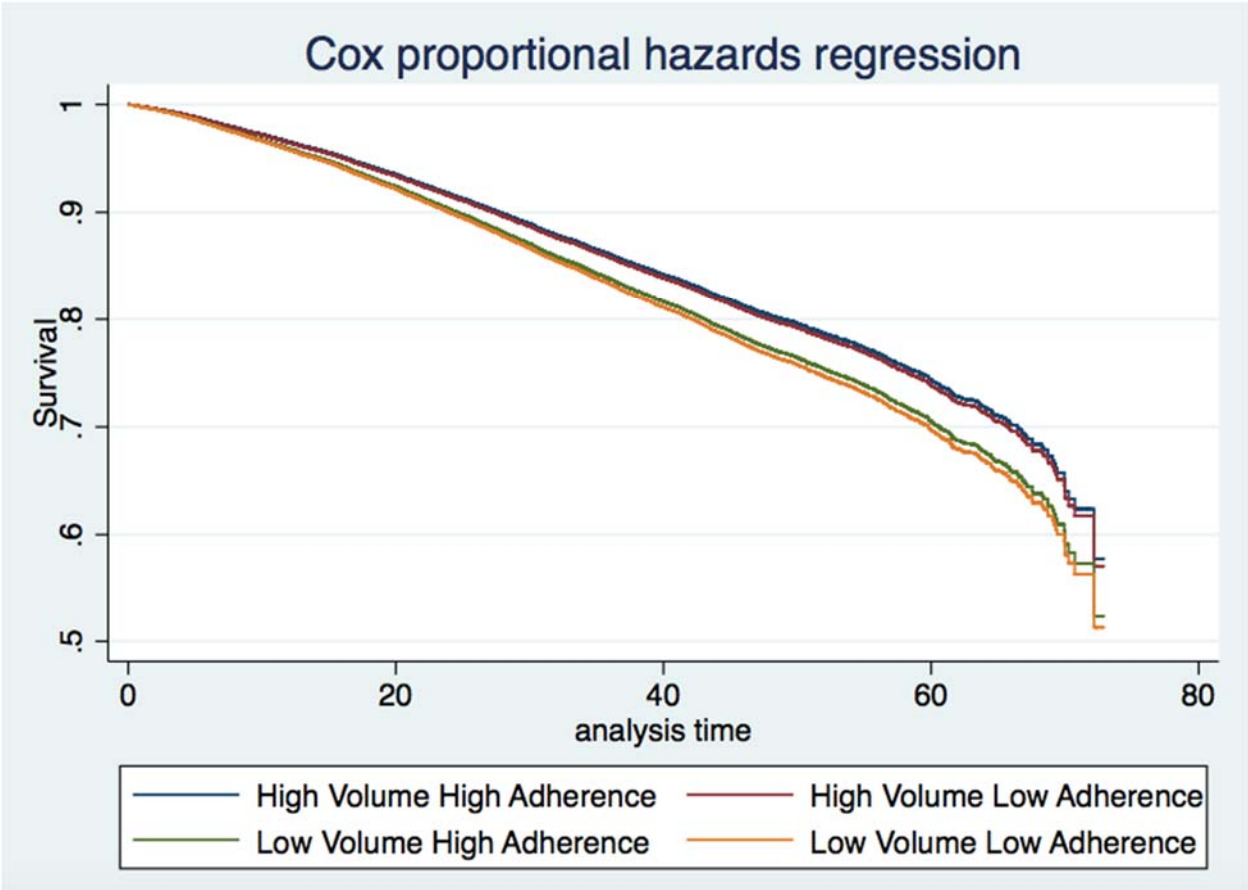

eTable: Cox proportional hazards model results for each term in the model

| <i>Cox Regression Survival Model Covariate</i> |                                             | <i>HR</i>     | <i>SE</i>     | <i>Z</i>      | <i>P&gt; z </i> | <i>95% CI</i> |              |
|------------------------------------------------|---------------------------------------------|---------------|---------------|---------------|-----------------|---------------|--------------|
| <i>Hospital Group</i>                          |                                             |               |               |               |                 |               |              |
| 2                                              |                                             | 1.0221<br>1   | 0.0794<br>405 | 0.2<br>8      | 0.7<br>78       | 0.8776<br>883 | 1.1902<br>95 |
| 3                                              |                                             | 1.1796<br>87  | 0.0781<br>085 | 2.5           | 0.0<br>13       | 1.0361<br>15  | 1.3431<br>54 |
| 4                                              |                                             | 1.2167<br>49  | 0.0814<br>769 | 2.9<br>3      | 0.0<br>03       | 1.0670<br>93  | 1.3873<br>94 |
| <i>Stage of Rectal Cancer</i>                  |                                             |               |               |               |                 |               |              |
| 2                                              |                                             | 1.2080<br>19  | 0.0493<br>657 | 4.6<br>2      | 0               | 1.1150<br>37  | 1.3087<br>54 |
| 3                                              |                                             | 1.3206        | 0.0556<br>249 | 6.6           | 0               | 1.2159<br>56  | 1.4342<br>49 |
| 4                                              |                                             | 4.7396<br>56  | 0.2274<br>23  | 32.<br>43     | 0               | 4.3142<br>33  | 5.2070<br>29 |
| <i>AGE</i>                                     |                                             |               |               |               |                 |               |              |
|                                                |                                             | 1.0386<br>11  | 0.0012<br>989 | 30.<br>29     | 0               | 1.0360<br>69  | 1.0411<br>6  |
| <i>Charlson-Dayo Score</i>                     |                                             |               |               |               |                 |               |              |
| 1                                              |                                             | 1.2263<br>56  | 0.0381<br>717 | 6.5<br>6      | 0               | 1.1537<br>78  | 1.3035<br>01 |
| 2                                              |                                             | 1.5695<br>94  | 0.0917<br>557 | 7.7<br>1      | 0               | 1.3996<br>76  | 1.7601<br>39 |
| 3                                              |                                             | 1.9002<br>53  | 0.1791<br>399 | 6.8<br>1      | 0               | 1.5796<br>73  | 2.2858<br>91 |
| <i>RACE</i>                                    |                                             |               |               |               |                 |               |              |
|                                                | <i>Black</i>                                | 1.2763<br>87  | 0.0591<br>64  | 5.2<br>6      | 0               | 1.1655<br>39  | 1.3977<br>77 |
|                                                | <i>American Indian, Aleutian, or Eskimo</i> | 1.1222<br>32  | 0.2319<br>632 | 0.5<br>6      | 0.5<br>77       | 0.7484<br>124 | 1.6827<br>69 |
|                                                | <i>Chinese</i>                              | 0.7103<br>191 | 0.1416<br>311 | -<br>1.7<br>2 | 0.0<br>86       | 0.4805<br>425 | 1.0499<br>66 |
|                                                | <i>Japanese</i>                             | 1.2298<br>59  | 0.2434<br>807 | 1.0<br>5      | 0.2<br>96       | 0.8343<br>325 | 1.8128<br>9  |
|                                                | <i>Filipino</i>                             | 0.7358<br>693 | 0.1439<br>319 | -<br>1.5<br>7 | 0.1<br>17       | 0.5015<br>457 | 1.0796<br>7  |
|                                                | <i>Hawaiian</i>                             | 0.6957<br>263 | 0.2367<br>335 | -<br>1.0<br>7 | 0.2<br>86       | 0.3571<br>097 | 1.3554<br>24 |
|                                                | <i>Korean</i>                               | 0.7482<br>563 | 0.1759<br>517 | -<br>1.2<br>3 | 0.2<br>17       | 0.4719<br>448 | 1.1863<br>41 |

|            |                                      |               |               |               |           |               |               |
|------------|--------------------------------------|---------------|---------------|---------------|-----------|---------------|---------------|
|            | <i>Vietnamese</i>                    | 0.7952<br>385 | 0.2245<br>535 | -<br>0.8<br>1 | 0.4<br>17 | 0.4572<br>371 | 1.3830<br>99  |
|            | <i>Laotian</i>                       | 0.6918<br>036 | 0.6673<br>058 | -<br>0.3<br>8 | 0.7<br>02 | 0.1044<br>536 | 4.5818<br>62  |
|            | <i>Hmong</i>                         | 4.0061<br>43  | 1.8095<br>35  | 3.0<br>7      | 0.0<br>02 | 1.6529<br>03  | 9.7096<br>98  |
|            | <i>Kampuchean</i>                    | 1.9984<br>08  | 1.3560<br>87  | 1.0<br>2      | 0.3<br>08 | 0.5285<br>335 | 7.5560<br>64  |
|            | <i>Thai</i>                          | 0.8686<br>354 | 0.6048<br>48  | -<br>0.2      | 0.8<br>4  | 0.2218<br>856 | 3.4005<br>25  |
|            | <i>Asian Indian or<br/>Pakistani</i> | 0.5266<br>983 | 0.1744<br>298 | -<br>1.9<br>4 | 0.0<br>53 | 0.2752<br>102 | 1.0079<br>97  |
|            | <i>Asian Indian</i>                  | 0.7005<br>624 | 0.2393<br>255 | -<br>1.0<br>4 | 0.2<br>98 | 0.3586<br>412 | 1.3684<br>65  |
|            | <i>Pakistani</i>                     | 0.4906<br>036 | 0.5313<br>954 | -<br>0.6<br>6 | 0.5<br>11 | 0.0587<br>158 | 4.0992<br>7   |
|            | <i>Micronesian, NOS</i>              | 2.8705<br>7   | 0.1948<br>546 | 15.<br>53     | 0         | 2.5129<br>77  | 3.2790<br>48  |
|            | <i>Guamanian, NOS</i>                | 2.3492<br>32  | 1.1629<br>38  | 1.7<br>3      | 0.0<br>84 | 0.8903<br>411 | 6.1986<br>24  |
|            | <i>Samoan</i>                        | 0.7198<br>441 | 0.4222<br>721 | -<br>0.5<br>6 | 0.5<br>75 | 0.2279<br>869 | 2.2728<br>3   |
|            | <i>Tongan</i>                        | 2.5998<br>76  | 1.7875<br>53  | 1.3<br>9      | 0.1<br>65 | 0.6756<br>256 | 10.004<br>59  |
|            | <i>Fiji Islander</i>                 | 2.8782<br>47  | 1.2442<br>13  | 2.4<br>5      | 0.0<br>14 | 1.2335<br>86  | 6.7156<br>3   |
|            | <i>New Guinean</i>                   | 8.68E-<br>19  | .             | .             | .         | .             | .             |
|            | <i>Asian, NOS</i>                    | 0.7030<br>493 | 0.1245<br>66  | -<br>1.9<br>9 | 0.0<br>47 | 0.4967<br>869 | 0.9949<br>503 |
|            | <i>Pacific Islander, NOS</i>         | 0.8485<br>182 | 0.5142<br>174 | -<br>0.2<br>7 | 0.7<br>86 | 0.2587<br>126 | 2.7829<br>46  |
|            | <i>Other</i>                         | 0.7288<br>172 | 0.1327<br>07  | -<br>1.7<br>4 | 0.0<br>82 | 0.5100<br>67  | 1.0413<br>82  |
|            | <i>Unknown</i>                       | 1.1262<br>06  | 0.1881<br>138 | 0.7<br>1      | 0.4<br>77 | 0.8117<br>808 | 1.5624<br>16  |
|            |                                      |               |               |               |           |               |               |
| <b>SEX</b> |                                      | 0.8186<br>914 | 0.0220<br>63  | -<br>7.4<br>2 | 0         | 0.7765<br>709 | 0.8630<br>964 |
